# Supplementary material
Source: MDPI journal article supplement (https://www.mdpi.com/2571-550X/6/1/3)
Supplement: s1 [file s1]

Supplementary File S1 – References for figures 10 to 17 and calibration range (2-sigma cal. BP) of the radiocarbon dates.

Figure 10 *Juniperus maximum*

S1 Llyn Gwernan : Lowe, J.J.; Lowe, S.; Fowler, A.J.; Hedges, R.E.M.; Austin, T.J.F. Comparison of accelerator and radiometric radiocarbon measurements obtained from Late Devensian Lateglacial lake sediments from Llyn Gwernan, North Wales, UK. *Boreas* **1988**, 17, 355–369. (11,266–11,958)

S2 Llyn Lydaw : Ince, J. Two postglacial pollen profiles from the uplands of Snowdonia, Gwynedd, North Wales. *New Phytol.* **1983**, 95, 159–172. (11,165–11,963)

S3 Nant Ffrancon : Hibbert, F.A.; Switsur, V.R. Radiocarbon dating of Flandrian pollen zones in Wales and northern England. *New Phytol.* **1976**, 77, 793–807. (10,706–12,371)

S4 Cwm Cywion : Ince, J. Two postglacial pollen profiles from the uplands of Snowdonia, Gwynedd, North Wales. *New Phytol.* **1983**, 95, 159–172. (10,730–11,394)

S5 Llyn Cororion : Watkins, R.; Scourse, J.D.; Allen, J.R.M. The Holocene vegetation history of the Arfon Platform, North Wales, UK. *Boreas* **2007**, 36, 170–181. (10,784–11,226)

S6 Knowsley Park : Cowell, R.; Innes, J.B. *The Wetlands of Merseyside*. North West Wetlands Survey 1, Lancaster Imprints 2. English Heritage & Lancaster University: Lancaster, UK, 1994. (10,282–10,670)

S7 Haweswater : Jones, R.T.; Marshall, J.D.; Crowley, S.F.; Bedford, A.; Richardson, N.; Bloemendal, J.; Oldfield, F. A high resolution, multiproxy Late-glacial record of climate change and intrasystem responses in northwest England. *J. Quat. Sci.* **2002**, 17, 329–340. (11,221–12,529)

S8 Blelham Bog : Pennington, W. A chronostratigraphic comparison of Late-Weichselian and Late-Devensian subdivisions, illustrated by two radiocarbon-dated profiles from western Britain. *Boreas* **1975**, 4, 157–171. (11,822–12,684)

S9 Blea Tarn : Harkness, D.D.; Wilson, H.W. Scottish Universities Research and Reactor Centre radiocarbon measurements I. *Radiocarbon* **1973**, 15, 554–565. (10,756–11,982)

S10 Red Sike Moss : Turner, J.; Hewetson, V.P.; Hibbert, F.A.; Lowry, K.H.; Chambers, C. The history of the vegetation and flora of Widdybank Fell and the Cow Green Reservoir Basin, Upper Teesdale. *Phil. Trans. R. Soc. B* **1973**, 265, 327–408. (10,762–12,045)

S11 Wheelhead Moss : Turner, J.; Hewetson, V.P.; Hibbert, F.A.; Lowry, K.H.; Chambers, C. The history of the vegetation and flora of Widdybank Fell and the Cow Green Reservoir Basin, Upper Teesdale. *Phil. Trans. R. Soc. B* **1973**, 265, 327–408. (11,110–12,157)

S12 Scaleby Moss : Godwin, H.; Walker, D.; Willis, E.H. Radiocarbon dating and post-glacial vegetation history: Scaleby Moss. *Proc. R. Soc. Lond. B.* **1957**, 147, 352–366. (11,236–12,515)

S13 Bigholm Burn : Moar, N.T. Late Weichselian and Flandrian pollen diagrams from south-west Scotland. *New Phytol.* **1969**, 68, 433–467. (10,407–11,326)

- S14 Sluggan Bog : Smith, A.G.; Goddard, I.C. A 12 500 year record of vegetational history at Sluggan Bog, Co. Antrim, N. Ireland (incorporating a pollen zone scheme for the non-specialist). *New Phytol.* **1991**, 119, 167–187. (10,587–11,236)
- S15 Slieve Gallion : Pilcher, J.R. Pollen analysis and radiocarbon dating of a peat on Slieve Gallion, Co. Tyrone, N. Ireland. *New Phytol.* **1973**, 72, 681–689. (10,712–11,240)
- S16 Roddans Port : Morrison, M.E.S.; Stephens, N. A submerged late-Quaternary deposit at Roddans Port, on the north-east coast of Ireland. *Phil. Trans. R. Soc. B* **1965**, 249, 221–255. (11,242–12,384)
- S17 Preece, R.C.; Coxon, P; Robinson, J.E. New biostratigraphic evidence for the post-glacial colonisation of Ireland and for Mesolithic forest disturbance. *J. Biogeogr.* **1986**, 13, 487–509. (10,252–12,071)
- S18 Kelly's Lough : Leira, M.; Cole, E.E.; Mitchell, F.J.G. Peat erosion and atmospheric deposition impacts on an oligotrophic lake in eastern Ireland. *J. Paleolimnol.* **2007**, 38, 49–71. (10,774–11,161)
- S19 Glendalough : Mitchell, F.J.G.; Maldonado-Ruiz, J. Vegetation development in the Glendalough Valley, eastern Ireland over the last 15,000 years. *Biol. Env.: Proc. Roy. Irish Acad.* **2018**, 118B, 55–68. (11,110–11,383)

#### Figure 11 *Betula* rise

- S1 Llyn Lydaw : Ince, J. Two postglacial pollen profiles from the uplands of Snowdonia, Gwynedd, North Wales. *New Phytol.* **1983**, 95, 159–172. (11,130–11,974)
- S2 Nant Ffrancon : Hibbert, F.A.; Switsur, V.R. Radiocarbon dating of Flandrian pollen zones in Wales and northern England. *New Phytol.* **1976**, 77, 793–807. (10,610–11,982)
- S3 Cwm Cywion : Ince, J. Two postglacial pollen profiles from the uplands of Snowdonia, Gwynedd, North Wales. *New Phytol.* **1983**, 95, 159–172. (10,730–11,394)
- S4 Crose Mere : Beales, P.W. The Late Devensian and Flandrian vegetational history of Crose Mere, Shropshire. *New Phytol.* **1980**, 85, 133–161. (11,347–12,595)
- S5 Red Moss : Hibbert, F.A.; Switsur, V.R.; West, R.G. Radiocarbon dating of Flandrian pollen zones at Red Moss, Lancashire. *Proc. R. Soc. Lond. B* **1971**, 177, 161–176. (10,788–11,606)
- S6 Windermere : Mackereth, F.J.H. Magnetic studies of freshwater sediments from northwest England and northern Ireland of the Earth's magnetic field as recorded in the sediments of lake Windermere. *Earth Plan. Sci. Lett.* **1971**, 12, 332–356. (10,734–12,646)
- S7 Weelhead Moss : Turner, J.; Hewetson, V.P.; Hibbert, F.A.; Lowry, K.H.; Chambers, C. The history of the vegetation and flora of Widdybank Fell and the Cow Green Reservoir Basin, Upper Teesdale. *Phil. Trans. R. Soc. B* **1973**, 265, 327–408. (11,184–12,389)
- S8 Scaleby Moss : Godwin, H.; Walker, D.; Willis, E.H. Radiocarbon dating and post-glacial vegetation history: Scaleby Moss. *Proc. R. Soc. Lond. B.* **1957**, 147, 352–366. (10,305–11,708)
- S9 Din Moss : Hibbert, F.A.; Switsur, V.R. Radiocarbon dating of Flandrian pollen zones in Wales and northern England. *New Phytol.* **1976**, 77, 793–807. (11,399–12,607)

- S10 The Dod : Innes, J.B.; Shennan, I. Palynology of archaeological and mire sediments from Dod, Borders Region, Scotland. *Archaeol. J.* **1991**, *148*, 1–45. (11,409–12,604)
- S11 Bigholm Burn : Moar, N.T. Late Weichselian and Flandrian pollen diagrams from south-west Scotland. *New Phytol.* **1969**, *68*, 433–467. (10,407–11,326)
- S12 Altnahinch : Smith, A.G.; Pilcher, J.R. Radiocarbon dates and vegetational history of the British Isles. *New Phytol.* **1973**, *72*, 903–914. (10,519–11,216)
- S13 Sluggan Bog : Smith, A.G.; Goddard, I.C. A 12 500 year record of vegetational history at Sluggan Bog, Co. Antrim, N. Ireland (incorporating a pollen zone scheme for the non-specialist). *New Phytol.* **1991**, *119*, 167–187. (10,445–11,160)
- S14 Slieve Gallion : Pilcher, J.R. Pollen analysis and radiocarbon dating of a peat on Slieve Gallion, Co. Tyrone, N. Ireland. *New Phytol.* **1973**, *72*, 681–689. (10,712–11,240)
- S15 Roddans Port : Morrison, M.E.S.; Stephens, N. A submerged late-Quaternary deposit at Roddans Port, on the north-east coast of Ireland. *Phil. Trans. R. Soc. B* **1965**, *249*, 221–255. (11,242–12,384)
- S16 Thomastown Bog : Turner, J.N.; Holmes, N.; Davis, S.R.; Leng, M.J.; Lamgdon, C.; Scaife, R.G. A multiproxy (micro-XRF, pollen, chironomid and stable isotope) lake sediment record for the Lateglacial to Holocene from Thomastown Bog, Ireland. *J. Quat. Sci.* **2015**, *30*, 514–528. (11,127–11,232)
- S17 Kelly's Lough : Leira, M.; Cole, E.E.; Mitchell, F.J.G. Peat erosion and atmospheric deposition impacts on an oligotrophic lake in eastern Ireland. *J. Paleolimnol.* **2007**, *38*, 49–71. (10,774–11,161)

## Figure 12 *Corylus* rise

- S1 Llyn Gwernan : Lowe, J.J.; Lowe, S.; Fowler, A.J.; Hedges, R.E.M.; Austin, T.J.F. Comparison of accelerator and radiometric radiocarbon measurements obtained from Late Devensian Lateglacial lake sediments from Llyn Gwernan, North Wales, UK. *Boreas* **1988**, *17*, 355–369. (9937–10,483)
- S3 Nant Ffrancon : Hibbert, F.A.; Switsur, V.R. Radiocarbon dating of Flandrian pollen zones in Wales and northern England. *New Phytol.* **1976**, *77*, 793–807. (9548–10,412)
- S3 Llyn Cororion : Watkins, R.; Scourse, J.D.; Allen, J.R.M. The Holocene vegetation history of the Arfon Platform, North Wales, UK. *Boreas* **2007**, *36*, 170–181. (10,242–10,554)
- S4 Crose Mere : Beales, P.W. The Late Devensian and Flandrian vegetational history of Crose Mere, Shropshire. *New Phytol.* **1980**, *85*, 133–161. (9937–10,483)
- S5 Knowsley Park : Cowell, R.; Innes, J.B. *The Wetlands of Merseyside*. North West Wetlands Survey 1, Lancaster Imprints 2. English Heritage & Lancaster University: Lancaster, UK, 1994. (10,197–10,545)
- S6 Red Moss : Hibbert, F.A.; Switsur, V.R.; West, R.G. Radiocarbon dating of Flandrian pollen zones at Red Moss, Lancashire. *Proc. R. Soc. Lond. B* **1971**, *177*, 161–176. (9535–10,374)
- S7 Threshfield Moor : Bartley, D.D.; Jones, I.P.; Smith, R.T. Studies in the Flandrian vegetational history of the Craven district of Yorkshire: the lowlands. *J. Ecol.* **1990**, *78*, 611–632. (10,309–11,102)
- S8 Blea Tarn : Harkness, D.D.; Wilson, H.W. Scottish Universities Research and Reactor Centre radiocarbon measurements I. *Radiocarbon* **1973**, *15*, 554–565. (9774–10,412)

- S9 Scaleby Moss : : Godwin, H.; Walker, D.; Willis, E.H. Radiocarbon dating and post-glacial vegetation history: Scaleby Moss. *Proc. R. Soc. Lond. B.* **1957**, 147, 352–366. (9557–10,574)
- S10 Bolton Fell Moss : Hughes, P.D.M.; Mauquoy, D.; Barber, K.E.; Langdon, P.G. Mire-development pathways and palaeoclimatic records from a full Holocene peat archive at Walton Moss, Cumbria, England. *Holocene* **2000**, 10, 465–479. (10,232–10,488)
- S11 Din Moss : Hibbert, F.A.; Switsur, V.R. Radiocarbon dating of Flandrian pollen zones in Wales and northern England. *New Phytol.* **1976**, 77, 793–807. (9706–10,717)
- S12 The Dod : Innes, J.B.; Shennan, I. Palynology of archaeological and mire sediments from Dod, Borders Region, Scotland. *Archaeol. J.* **1991**, 148, 1–45. (10,170–11,089)
- S13 Burnfoothill Moss : Tipping, R. Holocene evolution of a lowland Scottish landscape: Kirkpatrick Fleming. Part I. Peat- and pollen-stratigraphic evidence for raised moss development and climatic change. *Holocene* **1995**, 5, 69–81. (9544–9886)
- S14 Rotten Bottom : Tipping, R.M. Holocene upland environments. In *The Quaternary of Dumfries & Galloway. Field Guide*. Tipping, R.M., Ed.; Quaternary Research Association: London, UK, 1999; pp. 171–181. (9524–9684)
- S15 Catherine Hill : Tipping, R.M.; Milburn, P. Mid-Holocene charcoal fall in southern Scotland – temporal and spatial variability. *Palaeogeogr., Palaeoclimatol., Palaeoecol.* **2000**, 164, 177–193. (9937–10,712)
- S16 Pict's Knowe : Milburn, P; Tipping, R.M. Pict's Knowe: early-mid Holocene vegetation history and groundwater fluctuations. In *The Quaternary of Dumfries and Galloway. Field Guide*; Tipping, R.M., Ed.; Quaternary Research Association: London, UK, 1999; pp. 75–80. (9523–10,148)
- S17 Girvan : Boyd, W.E.; Dickson, J.H. Patterns in the geographical distribution of the early Flandrian *Corylus* rise in southwest Scotland. *New Phytol.* **1986**, 102, 615–623. (9678–10,555)
- S18 Round Loch of Glenhead : Jones, V.J.; Stevenson, A.C. Round Loch of Glenhead. In *Quaternary of Scotland*; Gordon, J.E., Sutherland, D.G., Eds.; Chapman and Hall: London, UK, 1993; pp. 609–613. (10,250–10,661)
- S19 Altnahinch : Smith, A.G.; Pilcher, J.R. Radiocarbon dates and vegetational history of the British Isles. *New Phytol.* **1973**, 72, 903–914. (9612–10,230)
- S20 Sluggan Bog : Smith, A.G.; Goddard, I.C. A 12 500 year record of vegetational history at Sluggan Bog, Co. Antrim, N. Ireland (incorporating a pollen zone scheme for the non-specialist). *New Phytol.* **1991**, 119, 167–187. (10,239–11,090)
- S21 Roddans Port : Morrison, M.E.S.; Stephens, N. A submerged late-Quaternary deposit at Roddans Port, on the north-east coast of Ireland. *Phil. Trans. R. Soc. B* **1965**, 249, 221–255. (10,290–11,149)
- S22 Glendalough : Mitchell, F.J.G.; Maldonado-Ruiz, J. Vegetation development in the Glendalough Valley, eastern Ireland over the last 15,000 years. *Biol. Env. : Proc. Roy. Irish Acad.* **2018**, 118B, 55–68. (10,226–10,485)

### Figure 13 *Ulmus* rise

S1 Nant Ffrancon : Hibbert, F.A.; Switsur, V.R. Radiocarbon dating of Flandrian pollen zones in Wales and northern England. *New Phytol.* **1976**, 77, 793–807. (8648–9403)

S2 Cwm Cywion : Ince, J. Two postglacial pollen profiles from the uplands of Snowdonia, Gwynedd, North Wales. *New Phytol.* **1983**, 95, 159–172. (8724–9886)

S3 Llyn Cororion : Watkins, R.; Scourse, J.D.; Allen, J.R.M. The Holocene vegetation history of the Arfon Platform, North Wales, UK. *Boreas* **2007**, 36, 170–181. (9683–10,182)

S4 Crose Mere : Beales, P.W. The Late Devensian and Flandrian vegetational history of Crose Mere, Shropshire. *New Phytol.* **1980**, 85, 133–161. (9308–10,252)

S5 Knowsley Park : Cowell, R.; Innes, J.B. *The Wetlands of Merseyside*. North West Wetlands Survey 1, Lancaster Imprints 2. English Heritage & Lancaster University: Lancaster, UK, 1994. (9791–10,488)

S6 Downholland Moss : Middleton, R.; Tooley, M.J.; Innes, J.B. *The Wetlands of South West Lancashire*. North West Wetlands Survey 7, Lancaster Imprints 20. English Heritage & Lancaster University: Lancaster, UK, 2013. (8562–9028)

S7 Red Moss : Hibbert, F.A.; Switsur, V.R.; West, R.G. Radiocarbon dating of Flandrian pollen zones at Red Moss, Lancashire. *Proc. R. Soc. Lond. B* **1971**, 177, 161–176. (9535–10,374)

S8 Langley Brook : Middleton, R.; Tooley, M.J.; Innes, J.B. *The Wetlands of South West Lancashire*. North West Wetlands Survey 7, Lancaster Imprints 20. English Heritage & Lancaster University: Lancaster, UK, 2013. (8589–9427)

S9 The Starr Hills, Lytham : Tooley, M.J. *Sea-Level Changes in North-West England during the Flandrian Stage*. Clarendon Press: Oxford, UK. (9093–9544)

S10 Thwaite Moss : Swindles, G. T.; Galloway, J.M.; Rushworth, G.; Wheeler, J.; Murphy, P.; Taylor, T.F. Natural to cultural: the vegetation history of the southern Yorkshire Dales, UK. *Rev. Palaeobot. Palynol.* **2020**, 284, 104328. (9094–9434)

S11 Blea Tarn : Harkness, D.D.; Wilson, H.W. Scottish Universities Research and Reactor Centre radiocarbon measurements I. *Radiocarbon* **1973**, 15, 554–565. (9305–9680)

S12 Weelhead Moss : Turner, J.; Hewetson, V.P.; Hibbert, F.A.; Lowry, K.H.; Chambers, C. The history of the vegetation and flora of Widdybank Fell and the Cow Green Reservoir Basin, Upper Teesdale. *Phil. Trans. R. Soc. B* **1973**, 265, 327–408. (8641–9245)

S13 Scaleby Moss : Godwin, H.; Walker, D.; Willis, E.H. Radiocarbon dating and post-glacial vegetation history: Scaleby Moss. *Proc. R. Soc. Lond. B.* **1957**, 147, 352–366. (9504–10,406)

S14 Bolton Fell Moss : Hughes, P.D.M.; Mauquoy, D.; Barber, K.E.; Langdon, P.G. Mire-development pathways and palaeoclimatic records from a full Holocene peat archive at Walton Moss, Cumbria, England. *Holocene* **2000**, 10, 465–479. (9707–10,157)

S15 Din Moss : Hibbert, F.A.; Switsur, V.R. Radiocarbon dating of Flandrian pollen zones in Wales and northern England. *New Phytol.* **1976**, 77, 793–807. (9333–10,204)

S16 The Dod : Innes, J.B.; Shennan, I. Palynology of archaeological and mire sediments from Dod, Borders Region, Scotland. *Archaeol. J.* **1991**, 148, 1–45. (8587–9263)

- S17 Bigholm Burn : Moar, N.T. Late Weichselian and Flandrian pollen diagrams from south-west Scotland. *New Phytol.* **1969**, 68, 433–467. (8056–8978)
- S18 Burnfoothill Moss : Tipping, R. Holocene evolution of a lowland Scottish landscape: Kirkpatrick Fleming. Part I. Peat- and pollen-stratigraphic evidence for raised moss development and climatic change. *Holocene* **1995**, 5, 69–81. (8009–8180)
- S19 Rotten Bottom : Tipping, R.M. Holocene upland environments. In *The Quaternary of Dumfries & Galloway. Field Guide*. Tipping, R.M., Ed.; Quaternary Research Association: London, UK, 1999; pp. 171–181. (9094–9427)
- S20 Pict's Knowe : Milburn, P; Tipping, R.M. Pict's Knowe: early-mid Holocene vegetation history and groundwater fluctuations. In *The Quaternary of Dumfries and Galloway. Field Guide*; Tipping, R.M., Ed.; Quaternary Research Association: London, UK, 1999; pp. 75–80. (9000–9367)
- S21 Cooran Lane : Birks H.H. 1975. Studies in the vegetational history of Scotland IV. Pine stumps in Scottish blanket peats. *Phil. Trans. Roy. Soc. Lond. B* **1975**, 270, 182–226. (8053–8588)
- S22 Altnahinch : Smith, A.G.; Pilcher, J.R. Radiocarbon dates and vegetational history of the British Isles. *New Phytol.* **1973**, 72, 903–914. (9094–9557)
- S23 Sluggan Bog : Smith, A.G.; Goddard, I.C. A 12 500 year record of vegetational history at Sluggan Bog, Co. Antrim, N. Ireland (incorporating a pollen zone scheme for the non-specialist). *New Phytol.* **1991**, 119, 167–187. (9256–9906)
- S24 Slieve Gallion : Pilcher, J.R. Pollen analysis and radiocarbon dating of a peat on Slieve Gallion, Co. Tyrone, N. Ireland. *New Phytol.* **1973**, 72, 681–689. (9546–10,152)
- S25 Ballynagilly : Pilcher, J.R.; Smith A.G. Palaeoecological investigations at Ballynagilly, a Neolithic and Bronze Age settlement in County Tyrone, Northern Ireland. *Phil. Trans. R. Soc. London B* **1979**, 286, 345–369. (8718–9280)
- S26 Roddams Port : Morrison, M.E.S.; Stephens, N. A submerged late-Quaternary deposit at Roddams Port, on the north-east coast of Ireland. *Phil. Trans. R. Soc. B* **1965**, 249, 221–255. (9743–10,651)
- S27 Thomastown Bog : Turner, J.N.; Holmes, N.; Davis, S.R.; Leng, M.J.; Langdon, C.; Scaife, R.G. A multiproxy (micro-XRF, pollen, chironomid and stable isotope) lake sediment record for the Lateglacial to Holocene from Thomastown Bog, Ireland. *J. Quat. Sci.* **2015**, 30, 514–528. (9443–9544)
- S28 Kelly's Lough : Leira, M.; Cole, E.E.; Mitchell, F.J.G. Peat erosion and atmospheric deposition impacts on an oligotrophic lake in eastern Ireland. *J. Paleolimnol.* **2007**, 38, 49–71. (9912–10,236)

#### Figure 14 *Quercus* rise

- S1 Nant Ffrancon : Hibbert, F.A.; Switsur, V.R. Radiocarbon dating of Flandrian pollen zones in Wales and northern England. *New Phytol.* **1976**, 77, 793–807. (8648–9403)
- S2 Cwm Cywion : Ince, J. Two postglacial pollen profiles from the uplands of Snowdonia, Gwynedd, North Wales. *New Phytol.* **1983**, 95, 159–172. (8724–9886)
- S3 Llyn Cororion : Watkins, R.; Scourse, J.D.; Allen, J.R.M. The Holocene vegetation history of the Arfon Platform, North Wales, UK. *Boreas* **2007**, 36, 170–181. (9527–9887)

- S4 Crose Mere : Beales, P.W. The Late Devensian and Flandrian vegetational history of Crose Mere, Shropshire. *New Phytol.* **1980**, 85, 133–161. (9019–10,145)
- S5 Knowsley Park : Cowell, R.; Innes, J.B. *The Wetlands of Merseyside*. North West Wetlands Survey 1, Lancaster Imprints 2. English Heritage & Lancaster University: Lancaster, UK, 1994. (9498–9890)
- S6 Downholland Moss : Middleton, R.; Tooley, M.J.; Innes, J.B. *The Wetlands of South West Lancashire*. North West Wetlands Survey 7, Lancaster Imprints 20. English Heritage & Lancaster University: Lancaster, UK, 2013. (8562–9028)
- S7 Red Moss : Hibbert, F.A.; Switsur, V.R.; West, R.G. Radiocarbon dating of Flandrian pollen zones at Red Moss, Lancashire. *Proc. R. Soc. Lond. B* **1971**, 177, 161–176. (8662–9490)
- S8 Langley Brook : Middleton, R.; Tooley, M.J.; Innes, J.B. *The Wetlands of South West Lancashire*. North West Wetlands Survey 7, Lancaster Imprints 20. English Heritage & Lancaster University: Lancaster, UK, 2013. (8589–9427)
- S9 Morecambe Bay C6 : Huddart, D.; Tooley, M.J.; Carter, P.A. The coasts of northwest England. In *The Quaternary History of the Irish Sea*; Kidson, C., Tooley, M.J. Eds.; Seel House Press: Liverpool, UK, 1977; pp. 119–154. (9029–9527)
- S10 Scaleby Moss : Godwin, H.; Walker, D.; Willis, E.H. Radiocarbon dating and post-glacial vegetation history: Scaleby Moss. *Proc. R. Soc. Lond. B* **1957**, 147, 352–366. (9504–10,406)
- S11 Bolton Fell Moss : Hughes, P.D.M.; Mauquoy, D.; Barber, K.E.; Langdon, P.G. Mire-development pathways and palaeoclimatic records from a full Holocene peat archive at Walton Moss, Cumbria, England. *Holocene* **2000**, 10, 465–479. (9418–9541)
- S11 Din Moss : Hibbert, F.A.; Switsur, V.R. Radiocarbon dating of Flandrian pollen zones in Wales and northern England. *New Phytol.* **1976**, 77, 793–807. (9333–10,204)
- S13 Bigholm Burn : Moar, N.T. Late Weichselian and Flandrian pollen diagrams from south-west Scotland. *New Phytol.* **1969**, 68, 433–467. (8056–8978)
- S14 Burnfoothill Moss : Tipping, R. Holocene evolution of a lowland Scottish landscape: Kirkpatrick Fleming. Part I. Peat- and pollen-stratigraphic evidence for raised moss development and climatic change. *Holocene* **1995**, 5, 69–81. (8009–8180)
- S15 Rotten Bottom : Tipping, R.M. Holocene upland environments. In *The Quaternary of Dumfries & Galloway. Field Guide*. Tipping, R.M., Ed.; Quaternary Research Association: London, UK, 1999; pp. 171–181. (9094–9427)
- S16 Pict's Knowe : Milburn, P.; Tipping, R.M. Pict's Knowe: early-mid Holocene vegetation history and groundwater fluctuations. In *The Quaternary of Dumfries and Galloway. Field Guide*; Tipping, R.M., Ed.; Quaternary Research Association: London, UK, 1999; pp. 75–80. (9000–9367)
- S17 Cooran Lane : Birks H.H. 1975. Studies in the vegetational history of Scotland IV. Pine stumps in Scottish blanket peats. *Phil. Trans. Roy. Soc. Lond. B* **1975**, 270, 182–226. (8053–8588)
- S18 Gortcorbies : Smith, A.G.; Pearson, G.W.; Pilcher, J.R. Belfast radiocarbon dates IV. *Radiocarbon* **1971**, 13, 450–467. (8378–8947)
- S19 Altnahinch : Smith, A.G.; Pilcher, J.R. Radiocarbon dates and vegetational history of the British Isles. *New Phytol.* **1973**, 72, 903–914. (8455–9000)

S20 Sluggan Bog : Smith, A.G.; Goddard, I.C. A 12 500 year record of vegetational history at Sluggan Bog, Co. Antrim, N. Ireland (incorporating a pollen zone scheme for the non-specialist). *New Phytol.* **1991**, 119, 167–187. (9007–9398)

S21 Slieve Gallion : Pilcher, J.R. Pollen analysis and radiocarbon dating of a peat on Slieve Gallion, Co. Tyrone, N. Ireland. *New Phytol.* **1973**, 72, 681–689. (8544–8987)

S22 Ballynagilly : Pilcher, J.R.; Smith A.G. Palaeoecological investigations at Ballynagilly, a Neolithic and Bronze Age settlement in County Tyrone, Northern Ireland. *Phil. Trans. R. Soc. London B* **1979**, 286, 345–369. (8718–9280)

S23 Roddans Port : Morrison, M.E.S.; Stephens, N. A submerged late-Quaternary deposit at Roddans Port, on the north-east coast of Ireland. *Phil. Trans. R. Soc. B* **1965**, 249, 221–255. (9743–10,651)

S24 Kelly's Lough : Leira, M.; Cole, E.E.; Mitchell, F.J.G. Peat erosion and atmospheric deposition impacts on an oligotrophic lake in eastern Ireland. *J. Paleolimnol.* **2007**, 38, 49–71. (9912–10,236)

#### Figure 15 *Pinus* rise

S1 Nant Ffrancon : Hibbert, F.A.; Switsur, V.R. Radiocarbon dating of Flandrian pollen zones in Wales and northern England. *New Phytol.* **1976**, 77, 793–807. (8648–9403)

S2 Cwm Cywion : Ince, J. Two postglacial pollen profiles from the uplands of Snowdonia, Gwynedd, North Wales. *New Phytol.* **1983**, 95, 159–172. (8724–9886)

S3 Llyn Cororion : Watkins, R.; Scourse, J.D.; Allen, J.R.M. The Holocene vegetation history of the Arfon Platform, North Wales, UK. *Boreas* **2007**, 36, 170–181. (9286–9537)

S4 Crose Mere : Beales, P.W. The Late Devensian and Flandrian vegetational history of Crose Mere, Shropshire. *New Phytol.* **1980**, 85, 133–161. (9019–10,145)

S5 Knowsley Park : Cowell, R.; Innes, J.B. *The Wetlands of Merseyside*. North West Wetlands Survey 1, Lancaster Imprints 2. English Heritage & Lancaster University: Lancaster, UK, 1994. (9684–10,222)

S6 Red Moss : Hibbert, F.A.; Switsur, V.R.; West, R.G. Radiocarbon dating of Flandrian pollen zones at Red Moss, Lancashire. *Proc. R. Soc. Lond. B* **1971**, 177, 161–176. (8662–9490)

S7 Wet Sleddale : Chinn, S.J.; Innes, J.B. Pollen analysis from Wet Sleddale. Appendix 3 (pp.19–22) in Cherry, J., Cherry P.J. Prehistoric habitation on the Cumbrian limestone uplands: occupation sites found between 1986 and 1993. *Trans. Cumberland Westmorland Antiq. Archaeol. Soc.* **1995**, 95, 1–22. (9304–9525)

S8 Burnfoothill Moss : Tipping, R. Holocene evolution of a lowland Scottish landscape: Kirkpatrick Fleming. Part I. Peat- and pollen-stratigraphic evidence for raised moss development and climatic change. *Holocene* **1995**, 5, 69–81. (9528–9686)

S9 Din Moss : Hibbert, F.A.; Switsur, V.R. Radiocarbon dating of Flandrian pollen zones in Wales and northern England. *New Phytol.* **1976**, 77, 793–807. (9333–10,204)

S10 The Dod : Innes, J.B.; Shennan, I. Palynology of archaeological and mire sediments from Dod, Borders Region, Scotland. *Archaeol. J.* **1991**, 148, 1–45. (8587–9263)

S11 Pict's Knowe : Milburn, P; Tipping, R.M. Pict's Knowe: early-mid Holocene vegetation history and groundwater fluctuations. In *The Quaternary of Dumfries and Galloway. Field Guide*; Tipping, R.M., Ed.; Quaternary Research Association: London, UK, 1999; pp. 75–80. (8648–9481)

S12 Sluggan Bog : Smith, A.G.; Goddard, I.C. A 12 500 year record of vegetational history at Sluggan Bog, Co. Antrim, N. Ireland (incorporating a pollen zone scheme for the non-specialist). *New Phytol.* **1991**, *119*, 167–187. (8433–8995)

S13 Beaghmore : Pilcher, J.R. Archaeology, palaeoecology and <sup>14</sup>C dating of the Beaghmore stone circle site. *Ulster J. Archaeol.* **1969**, *32*, 73–91. (7667–7981)

S14 Ballynagilly : Pilcher, J.R.; Smith A.G. Palaeoecological investigations at Ballynagilly, a Neolithic and Bronze Age settlement in County Tyrone, Northern Ireland. *Phil. Trans. R. Soc. London B* **1979**, *286*, 345–369. (7939–8317)

S15 Kelly's Lough : Leira, M.; Cole, E.E.; Mitchell, F.J.G. Peat erosion and atmospheric deposition impacts on an oligotrophic lake in eastern Ireland. *J. Paleolimnol.* **2007**, *38*, 49–71. (9025–9397)

#### Figure 16 *Alnus* rise

S1 Bryn y Castell : Mighall, T. ; Chambers, F.M. Holocene vegetation history and human impact at Bryn y Castell, Snowdonia, north Wales. *New Phytol.* **1995**, *130*, 299–321. (7462–7621)

S2 Nant Ffrancon : Hibbert, F.A.; Switsur, V.R. Radiocarbon dating of Flandrian pollen zones in Wales and northern England. *New Phytol.* **1976**, *77*, 793–807. (7471–7840)

S3 Melynlllyn : Walker, R. Diatom and sediment studies of a sediment profile from Melynlllyn, a mountain tarn in Snowdonia, North Wales. *New Phytol.* **1978**, *81*, 791–804. (7869–8514)

S4 Crose Mere : Beales, P.W. The Late Devensian and Flandrian vegetational history of Crose Mere, Shropshire. *New Phytol.* **1980**, *85*, 133–161. (7982–8385)

S5 Alport Moor : Tallis, J.H. Forest and moorland in the South Pennine uplands in the mid-Flandrian period: the spread of moorland—local, regional and national. *J. Ecol.* **1991**, *79*, 401–415. (8024–8318)

S6 Walkers Heath : Leah, M.D.; Wells, C.E.; Appleby, C.; Huckerby, E. *The Wetlands of Cheshire*. North West Wetlands Survey 4, Lancaster Imprints 5. English Heritage & Lancaster University: Lancaster, UK, 1997. (7736–8301)

S7 Hatchmere : Switsur, V.R.; West, R.G. University of Cambridge natural radiocarbon measurements XIV. *Radiocarbon* **1975**, *17*, 301–312. (8003–8407)

S8 Bidston Moss : Cowell, R.; Innes, J.B. *The Wetlands of Merseyside*. North West Wetlands Survey 1, Lancaster Imprints 2. English Heritage & Lancaster University: Lancaster, UK, 1994. (8028–8325)

S9 Flea Moss Wood : Cowell, R.; Innes, J.B. *The Wetlands of Merseyside*. North West Wetlands Survey 1, Lancaster Imprints 2. English Heritage & Lancaster University: Lancaster, UK, 1994. (7939–8180))

S10 Ince Blundell : Cowell, R.; Innes, J.B. *The Wetlands of Merseyside*. North West Wetlands Survey 1, Lancaster Imprints 2. English Heritage & Lancaster University: Lancaster, UK, 1994. (7724–8175)

S11 Red Moss : Hibbert, F.A.; Switsur, V.R.; West, R.G. Radiocarbon dating of Flandrian pollen zones at Red Moss, Lancashire. *Proc. R. Soc. Lond. B* **1971**, *177*, 161–176. (7694–8167)

- S12 Martons Both : Bartley, D.D.; Jones, I.P.; Smith, R.T. Studies in the Flandrian vegetational history of the Craven district of Yorkshire: the lowlands. *J. Ecol.* **1990**, 78, 611–632. (7613–7937)
- S13 White Moss : Bartley, D.D.; Jones, I.P.; Smith, R.T. Studies in the Flandrian vegetational history of the Craven district of Yorkshire: the lowlands. *J. Ecol.* **1990**, 78, 611–632. (8210–8543)
- S14 Burnmoor Tarn : Pennington, W. Vegetation history in the north-west of England: a regional synthesis. In *Studies in the Vegetation History of the British Isles*; Walker, D., West, R.G., Eds.; Cambridge University Press: London, 1970, pp. 41–79. (7875–8320)
- S15 Blea Tarn : Harkness, D.D.; Wilson, H.W. Scottish Universities Research and Reactor Centre radiocarbon measurements I. *Radiocarbon* **1973**, 15, 554–565. (7949–8277)
- S16 Cowgate Farm : Hanan, D. Holocene relative sea-level changes along the north-west Cumbrian coastline. Ph.D. Thesis, University of York; 2018. (8027–8298)
- S17 Wedholme Flow : Hodgkinson, D.; Huckerby, E.; Middleton, R.; Wells, C.E. *The Lowland Wetlands of Cumbria*. North West Wetlands Survey 6, Lancaster Imprints 8. English Heritage & Lancaster University: Lancaster, UK, 2000. (7441–7929)
- S18 Scaleby Moss : Godwin, H.; Walker, D.; Willis, E.H. Radiocarbon dating and post-glacial vegetation history: Scaleby Moss. *Proc. R. Soc. Lond. B.* **1957**, 147, 352–366. (7574–9076)
- S19 Solway Moss : Hodgkinson, D.; Huckerby, E.; Middleton, R.; Wells, C.E. *The Lowland Wetlands of Cumbria*. North West Wetlands Survey 6, Lancaster Imprints 8. English Heritage & Lancaster University: Lancaster, UK, 2000. (7795–8000)
- S20 The Dod : Innes, J.B.; Shennan, I. Palynology of archaeological and mire sediments from Dod, Borders Region, Scotland. *Archaeol. J.* **1991**, 148, 1–45. (7798–8547)
- S21 Catherine Hill : Tipping, R.M.; Milburn, P. Mid-Holocene charcoal fall in southern Scotland – temporal and spatial variability. *Palaeogeogr., Palaeoclimatol., Palaeoecol.* **2000**, 164, 177–193. (7705–7950)
- S22 Burnfoothill Moss : Tipping, R. Holocene evolution of a lowland Scottish landscape: Kirkpatrick Fleming. Part I. Peat- and pollen-stratigraphic evidence for raised moss development and climatic change. *Holocene* **1995**, 5, 69–81. (7757–7965)
- S23 Pict's Knowe : Milburn, P.; Tipping, R.M. Pict's Knowe: early-mid Holocene vegetation history and groundwater fluctuations. In *The Quaternary of Dumfries and Galloway. Field Guide*; Tipping, R.M., Ed.; Quaternary Research Association: London, UK, 1999; pp. 75–80. (8048–8381)
- S24 Cooran Lane : Birks H.H. 1975. Studies in the vegetational history of Scotland IV. Pine stumps in Scottish blanket peats. *Phil. Trans. Roy. Soc. Lond. B* **1975**, 270, 182–226. (7312–8017)
- S25 Round Loch of Glenhead : Jones, V.J.; Stevenson, A.C. Round Loch of Glenhead. In *Quaternary of Scotland*; Gordon, J.E., Sutherland, D.G., Eds.; Chapman and Hall: London, UK, 1993; pp. 609–613. (7594–7920)
- S26 Sluggan Bog : Smith, A.G.; Goddard, I.C. A 12 500 year record of vegetational history at Sluggan Bog, Co. Antrim, N. Ireland (incorporating a pollen zone scheme for the non-specialist). *New Phytol.* **1991**, 119, 167–187. (7464–7788)
- S27 Ballyscullion : Smith, A.G.; Pearson, G.W.; Pilcher, J. Belfast radiocarbon dates III. *Radiocarbon* **1971**, 13, 103–125. (7623–7947)

S28 Killmaddy Lough : Hiron, K.R.; Edwards, K.J. Events at and around the first and second *Ulmus* Declines: palaeoecological investigations in Co. Tyrone, Northern Ireland. *New Phytol.* **1986**, *104*, 131–153. (7864–8423)

S29 Ringneil Quay : Morrison, M.E.S. The palynology of Ringneil Quay, a new Mesolithic site in Co. Down, Northern Ireland. *Proc. Roy. Irish Acad.* **1961**, *61C*, 171–182. (7795–8300)

S30 Carrivmoragh : Pearson, G.W.; Pilcher, J.R. Belfast radiocarbon dates VIII. *Radiocarbon* **1975**, *17*, 226–238. (8180–8410)

S31 Lackan : Holland, S.M. Pollen analytical studies concerning settlements and early ecology in Co. Down, N. Ireland. Ph.D. Thesis, Queen's Univ., Belfast, 1975. (7613–7996)

#### Figure 17 *Ulmus* Decline

S1 Moel y Gerddi : Chambers, F.M.; Price, S.M. Palaeoecology of *Alnus* (alder): early post-glacial rise in a valley mire, north-west Wales. *New Phytol.* **1985**, *101*, 333–344. (5748–6184)

S2 Bryn y Castell : Mighall, T. ; Chambers, F.M. Holocene vegetation history and human impact at Bryn y Castell, Snowdonia, north Wales. *New Phytol.* **1995**, *130*, 299–321. (5322–5582)

S3 Nant Ffrancon : Hibbert, F.A.; Switsur, V.R. Radiocarbon dating of Flandrian pollen zones in Wales and northern England. *New Phytol.* **1976**, *77*, 793–807. (5623–5925)

S4 Melynlyn : Walker, R. Diatom and sediment studies of a sediment profile from Melynlyn, a mountain tarn in Snowdonia, North Wales. *New Phytol.* **1978**, *81*, 791–804. (5307–5653)

S5 Llyn Cororion : Watkins, R.; Scourse, J.D.; Allen, J.R.M. The Holocene vegetation history of the Arfon Platform, North Wales, UK. *Boreas* **2007**, *36*, 170–181. (5592–5892)

S6 Crose Mere : Beales, P.W. The Late Devensian and Flandrian vegetational history of Crose Mere, Shropshire. *New Phytol.* **1980**, *85*, 133–161. (5735–6396)

S7 Robinson's Moss : Tallis, J.H.; Switsur, V.R. Forest and moorland in the South Pennine uplands in the mid-Flandrian period. II. The hillslope forests. *J. Ecol.* **1990**, *78*, 857–883. (5472–5740)

S8 Hatchmere : Switsur, V.R.; West, R.G. University of Cambridge natural radiocarbon measurements XIV. *Radiocarbon* **1975**, *17*, 301–312. (5905–6274)

S9 Park Road, Meols : Cowell, R.; Innes, J.B. *The Wetlands of Merseyside*. North West Wetlands Survey 1, Lancaster Imprints 2. English Heritage & Lancaster University: Lancaster, UK, 1994. (5741–5987)

S10 Knowsley Park : Cowell, R.; Innes, J.B. *The Wetlands of Merseyside*. North West Wetlands Survey 1, Lancaster Imprints 2. English Heritage & Lancaster University: Lancaster, UK, 1994. (5916–6274)

S11 Red Moss : Hibbert, F.A.; Switsur, V.R.; West, R.G. Radiocarbon dating of Flandrian pollen zones at Red Moss, Lancashire. *Proc. R. Soc. Lond. B* **1971**, *177*, 161–176. (5611–5982)

S12 Eshton Tarn : Bartley, D.D.; Jones, I.P.; Smith, R.T. Studies in the Flandrian vegetational history of the Craven district of Yorkshire: the lowlands. *J. Ecol.* **1990**, *78*, 611–632. (5486–5991)

S13 White Moss : Bartley, D.D.; Jones, I.P.; Smith, R.T. Studies in the Flandrian vegetational history of the Craven district of Yorkshire: the lowlands. *J. Ecol.* **1990**, *78*, 611–632. (5598–6170)

- S14 Little Hawes Water : Taylor J.J.; Innes J.B.; Jones M.D.H. Archaeological site location by the integration of geophysical and palynological techniques in an environmental survey role. In *Whither Environmental Archaeology?*; Luff R.M., Rowley-Conwy P.A., Eds.; Oxbow Monograph 38, Oxford, UK, 1994, pp. 13–23. (5760–5990)
- S15 Skelwith Pool : Zong, Y.; Tooley, M.J. Holocene sea-level changes and crustal movements in Morecambe Bay, northwest England. *J. Quat. Sci.* **1996**, *11*, 43–58. (5660–6171)
- S16 Barfield Tarn : Pennington, W. The effect of Neolithic man on the environment in north-west England: the use of absolute pollen diagrams. In Evans, J.G., Limbrey, S., Cleere, H. Eds.; *The Effect of Man on the Landscape: the Highland Zone*. Council for British Archaeology: Research Report 11, London, UK, 1975, pp. 74–85. (5894–6398)
- S17 Williamsons Moss : Tipping, R.M. Williamson's Moss: palynological evidence for the Mesolithic-Neolithic transition. In Boardman, J., Walden, J. Eds.; *Cumbria Field Guide*. Quaternary Research Association: Oxford, UK, 1994; pp. 104–127. (6004–6396)
- S18 Blea Tarn : Pennington, W. The effect of Neolithic man on the environment in north-west England: the use of absolute pollen diagrams. In Evans, J.G., Limbrey, S., Cleere, H. Eds.; *The Effect of Man on the Landscape: the Highland Zone*. Council for British Archaeology: Research Report 11, London, UK, 1975, pp. 74–85. (5591–5892)
- S19 Ennerdale Water : Harkness, D.D.; Wilson, H.W. Scottish Universities Research and Reactor Centre radiocarbon measurements III. *Radiocarbon* **1979**, *21*, 203–256. (5726–5995)
- S20 Angle Tarn : Tutin, W. The usefulness of pollen analysis in interpretation of stratigraphic horizons, both Late-glacial and post-glacial. *Mitt. Internat. Verein. Limnol.* **1969**, *17*, 154–164. (5720–6277)
- S21 Quick Moss : Rowell, T.K.; Turner, J. Litho-, humic- and pollen stratigraphy at Quick Moss, Northumberland. *J. Ecol.* **1985**, *73*, 11–25. (5488–5741)
- S22 Scaleby Moss : Godwin, H.; Walker, D.; Willis, E.H. Radiocarbon dating and post-glacial vegetation history: Scaleby Moss. *Proc. R. Soc. Lond. B* **1957**, *147*, 352–366. (5472–5990)
- S23 Bigholm Burn : Moar, N.T. Late Weichselian and Flandrian pollen diagrams from south-west Scotland. *New Phytol.* **1969**, *68*, 433–467. (5945–6496)
- S24 Burnfoothill Moss : Tipping, R. Holocene evolution of a lowland Scottish landscape: Kirkpatrick Fleming. Part I. Peat- and pollen-stratigraphic evidence for raised moss development and climatic change. *Holocene* **1995**, *5*, 69–81. (5468–5649)
- S25 Clatteringshaws Loch : Birks, H.H. Studies in the vegetational history of Scotland. IV. Pine stumps in the Scottish blanket peats. *Phil. Trans. R. Soc. Lond. B* **1975**, *270*, 181–226. (5598–6170)
- S26 Loch Dee : Edwards, K.J.; Hiron, K.R.; Newell, P.J. Palaeoecological and prehistoric context of minerogenic layers in blanket peat: a study from Loch Dee, southwest Scotland. *Holocene* **1991**, *1*, 29–39. (5997–6270)
- S27 Round Loch of Glenhead : Jones, V.J.; Stevenson, A.C. Round Loch of Glenhead. In *Quaternary of Scotland*; Gordon, J.E., Sutherland, D.G., Eds.; Chapman and Hall: London, UK, 1993; pp. 609–613. (5743–6181)

- S28 Slieve Gallion : Pilcher, J.R. Pollen analysis and radiocarbon dating of a peat on Slieve Gallion, Co. Tyrone, N. Ireland. *New Phytol.* **1973**, 72, 681–689. (5473–5860)
- S29 Ballyscullion : Smith, A.G.; Pearson, G.W.; Pilcher, J. Belfast radiocarbon dates III. *Radiocarbon* **1971**, 13, 103–125. (5726–5995)
- S30 Ballynagilly : Pilcher, J.R.; Smith A.G. Palaeoecological investigations at Ballynagilly, a Neolithic and Bronze Age settlement in County Tyrone, Northern Ireland. *Phil. Trans. R. Soc. London B* **1979**, 286, 345–369. (5669–6175)
- S31 Killmaddy Lough : Hiron, K.R.; K.J. Edwards. Events at and around the first and second *Ulmus* declines: Palaeoecological investigations in Co. Tyrone, Northern Ireland. *New Phytol.* **1986**, 104, 131–153. (5600–5987)
- S32 Weir's Lough : Hiron, K.R.; K.J. Edwards. Events at and around the first and second *Ulmus* declines: Palaeoecological investigations in Co. Tyrone, Northern Ireland. *New Phytol.* **1986**, 104, 131–153. (5916–6277)
- S33 Carrivmoragh : Pearson, G.W.; Pilcher, J.R. Belfast radiocarbon dates VIII. *Radiocarbon* **1975**, 17, 226–238. (5326–5589)
- S34 Lackan : Holland, S.M. Pollen analytical studies concerning settlements and early ecology in Co. Down, N. Ireland. Ph.D. Thesis, Queen's Univ., Belfast; 1975. (5728–5921)
- S35 Lough Muckno : Chique, C.; Molloy, K.; Potito, A.P. Mid-Late Holocene vegetational history and land-use dynamics in County Monaghan, northeastern Ireland – the palynological record of Lough Muckno. *J. North Atlantic* **2017**, 32, 1–24. (5759–6000)
- S36 Kelly's Lough : Leira, M.; Cole, E.E.; Mitchell, F.J.G. Peat erosion and atmospheric deposition impacts on an oligotrophic lake in eastern Ireland. *J. Paleolimnol.* **2007**, 38, 49–71. (6020–6313)
